# Supplementary material for: MicroRNA‐761 is upregulated in hepatocellular carcinoma and regulates tumorigenesis by targeting Mitofusin‐2
Source: PubMed Central journal article supplement — Cancer Sci. 2016 Mar 30;107(4):424–32. doi: 10.1111/cas.12904 (PMC4832850; doi:10.1111/cas.12904), 2016-03-30
Supplement: CAS-107-424-s002.pdf [file CAS-107-424-s002.pdf]

**Table 1 The candidate miRNAs**

|                    | <b>Predicted consequential pairing of target region (top) and miRNA (bottom)</b> | <b>Position of MFN2 3' UTR</b> |
|--------------------|----------------------------------------------------------------------------------|--------------------------------|
| hsa-miR-3619-5p    | 5' ...UUUCCCCACCUUUGCCUGCUGU...<br>         <br>3' CGACGUGGUCGGAC-GGACGACU       | 177-183                        |
| <b>hsa-miR-761</b> | 5' ...UUUCCCCACCUUUGCCUGCUGU...<br>     <br>3' ACACAGUCAAAAGUGGGACGACG           | 177-183                        |
| hsa-miR-214-3p     | 5' ...UUUCCCCACCUUUGCCUGCUGU...<br>     <br>3' UGACGGACAGACACGGACGACA            | 177-183                        |
| <b>hsa-miR-761</b> | 5' ...GUGGUAGAAAGGAUGCUGCUGAG...<br>     <br>3' ACACAGUCAAAAGUGGGACGACG          | 622-628                        |
| hsa-miR-3619-5p    | 5' ...GUGGUAGAAAGGAUGCUGCUGAG...<br>     <br>3' CGACGUGGUCGGACGGACGACU           | 622-628                        |
| hsa-miR-214-3p     | 5' ...GUGGUAGAAAGGAUGCUGCUGAG...<br>     <br>3' UGACGGACAGACACGGACGACA           | 622-628                        |
| <b>hsa-miR-761</b> | 5' ...AAAAGCACUUUAAUGCUGCUGAC...<br>     <br>3' ACACAGUCAAAAGUGGGACGACG          | 1786-1792                      |
| hsa-miR-3619-5p    | 5' ...AAAAGCACUUUAAUGCUGCUGAC...<br>     <br>3' CGACGUGGUCGGACGGACGACU           | 1786-1792                      |
| hsa-miR-214-3p     | 5' ...AAAAGCACUUUAAUGCUGCUGAC...<br>     <br>3' UGACGGACAGACACGGACGACA           | 1786-1792                      |
