# Supplementary material for: MicroRNA‐761 is upregulated in hepatocellular carcinoma and regulates tumorigenesis by targeting Mitofusin‐2
Source: PubMed Central journal article supplement — Cancer Sci. 2016 Mar 30;107(4):424–32. doi: 10.1111/cas.12904 (PMC4832850; doi:10.1111/cas.12904), 2016-03-30
Supplement: CAS-107-424-s003.pdf [file CAS-107-424-s003.pdf]

Table 2 Correlation of miR-761 expression and clinicopathological characteristics

| Variable                     | Low | High | P value      |
|------------------------------|-----|------|--------------|
| <b>In general</b>            |     |      |              |
|                              | 18  | 32   |              |
| <b>Sex</b>                   |     |      |              |
| Male                         | 12  | 24   | 0.545        |
| Female                       | 6   | 8    |              |
| <b>Age(years)</b>            |     |      |              |
| ≤50                          | 5   | 10   | 0.491        |
| >50                          | 13  | 22   |              |
| <b>Tumor size(cm)</b>        |     |      |              |
| ≤5                           | 13  | 9    | <b>0.001</b> |
| >5                           | 5   | 23   |              |
| <b>AFP(ng/ml)</b>            |     |      |              |
| ≤400                         | 10  | 18   | 0.566        |
| >400                         | 8   | 14   |              |
| <b>HBsAg</b>                 |     |      |              |
| Positive                     | 15  | 28   | 0.488        |
| Negative                     | 3   | 4    |              |
| <b>Anti-HCV</b>              |     |      |              |
| Positive                     | 1   | 3    | 0.584        |
| Negative                     | 17  | 29   |              |
| <b>Vascular invasion</b>     |     |      |              |
| Yes                          | 3   | 6    | 0.576        |
| No                           | 15  | 26   |              |
| <b>AJCC stage</b>            |     |      |              |
| I - II                       | 10  | 11   | <b>0.038</b> |
| III-IV                       | 8   | 21   |              |
| <b>tumor differentiation</b> |     |      |              |
| I - II                       | 8   | 19   | <b>0.026</b> |
| III-IV                       | 10  | 13   |              |
| <b>liver Cirrhosis</b>       |     |      |              |
| YES                          | 13  | 24   | 0.547        |
| no                           | 5   | 8    |              |
